# Supplementary material for: Twenty‐four hour continuous transvenous temporary right ventricular pacing in healthy horses
Source: PubMed Central journal article supplement (PMC11099695; doi:10.1111/jvim.17027), 2024-03-21
Supplement: JVIM-38-1751-s003.pdf [file JVIM-38-1751-s003.pdf]

**Supplementary Table 1:** Individual horse variation in technique

| Horse | Introducer Size | First Pacing Catheter  | Second Pacing Catheter |
|-------|-----------------|------------------------|------------------------|
| 1     | 7 F             | 6 F torque-directed    | 6 F torque-directed*   |
| 2     | 10 F            | 6 F torque-directed*   | 6 F torque-directed    |
| 3     | 7 F             | 5 F balloon floatation | 6 F torque-directed*   |
| 4     | 7 F             | 6 F torque-directed*   | 6 F torque-directed    |
| 5     | 7 F             | 6 F torque-directed*   | 6 F torque-directed    |
| 6     | 10 F            | 6 F torque-directed*   | 6 F torque-directed    |

\* indicates which catheter was in place for the 24-hour unrestricted pacing period
